# Supplementary material for: A New Strategy for Quality Evaluation and Identification of Representative Chemical Components in Polygonum multiflorum Thunb.
Source: Hindawi journal article supplement (doi:10.1155/2017/6238464), 2017-01-01

Table S1 RHSW and PHSW from various productive area

| RHSW | productive area              | PHSW | productive area               |
|------|------------------------------|------|-------------------------------|
| 1    | Kunming, Yunnan Province     | 1    | Yulin, Guangxi Province       |
| 2    | Changchun, Jilin Province    | 2    | Baoding, Hebei Province       |
| 3    | Tongrentang, Anhui Province  | 3    | Guangzhou, Guangdong Province |
| 4    | Tongrentang, Beijing         | 4    | Zhaoqing, Guangdong Province  |
| 5    | Dabashan, Sichuan Province   | 5    | Bozhou, Anhui Province        |
| 6    | Bozhou, Anhui Province       | 6    | Shaoyang, Hunan Province      |
| 7    | Huoshan, Anhui Province      | 7    | Shijiazhuang, Hebei Province  |
| 8    | Yuncheng, Shanxi Province    | 8    | Changsha, Hunan Province      |
| 9    | Shantou, Guangdong Province  | 9    | Xian Shaanxi Province         |
| 10   | Zhaoqing, Guangdong Province | 10   | Suzhou, Jiangsu Province      |
| 11   | Yulin, Guangxi Province      | 11   | Handan, Hebei Province        |
| 12   | Yulihong, Guangxi Province   | 12   | Dabashan, Sichuan Province    |
| 13   | Yancheng, Jiangsu Province   | 13   | Heyuan, Guangdong Province    |
| 14   | Baoding, Hebei Province      | 14   | Tongrentang, Beijing          |
| 15   | Shijiazhuang, Hebei Province | 15   | Nantong, Jiangsu Province     |
| 16   | Taihang, Henan Province      | 16   | Weinan, Shaanxi Province      |
| 17   | Yichang, Hubei Province      | 17   | Dazhou, Sichuan Province      |
| 18   | Xichuang, Sichuan Province   | 18   | Guiyang, Guizhou Province     |
| 19   | Leping, Guizhou Province     | 19   | Hangzhou, Zhejiang Province   |
| 20   | Liupanshui, Guizhou Province | 20   | Leshan, Sichuan Province      |
| 21   | Wangmo, Guizhou Province     | 21   | Fuzhou, Fujian Province       |
| 22   | Zhenning, Guizhou Province   |      |                               |
| 23   | Qianxi, Guizhou Province     |      |                               |
| 24   | Qianjiang, Guizhou Province  |      |                               |
| 25   | Baojin, Shaanxi Province     |      |                               |

RHSW : Raw *Polygonum multiflorum* Thunb.; PHSW: Processed *Polygonum multiflorum* Thunb.

Table S2 The calibration curve range for 16 components in HSW

| Component                   | Regression equation  | R <sup>2</sup> | Linearity range<br>µg/mL |
|-----------------------------|----------------------|----------------|--------------------------|
| Gallic acid                 | y = 92.84x + 0.04652 | 0.9998         | 0.33~32.75               |
| Procyanidins B <sub>1</sub> | y = 12.091x + 4.093  | 0.9995         | 0.33~32.67               |
| Catechin                    | y = 18.738x + 11.358 | 0.9997         | 0.39~196.00              |
| Gallate                     | y = 79.687x + 34.41  | 0.9992         | 0.71~71.00               |
| Aloe-emodin glycoside       | y = 31.66x + 4.313   | 0.9981         | 0.39~19.50               |
| Polydatin                   | y = 43.21x + 21.93   | 0.9983         | 0.62~62.50               |

|                    |                        |        |              |
|--------------------|------------------------|--------|--------------|
| Stilbene glucoside | $y = 22.77x + 2462.6$  | 0.9994 | 2.70~2700.00 |
| Rhaponticin        | $y = 34.648x + 9.4192$ | 0.9999 | 0.24~35.50   |
| Resveratrol        | $y = 83.18x + 17.867$  | 0.9999 | 0.02~47.00   |
| Emodin glycoside   | $y = 79.125x + 2.523$  | 0.9999 | 1.88~375.00  |
| Physcion glycoside | $y = 108.7x - 44.554$  | 0.9998 | 0.43~43.00   |
| Aloe emodin        | $y = 46.95x + 6.665$   | 0.9999 | 0.02~8.88    |
| Rhein              | $y = 55.14x + 11.70$   | 0.9976 | 0.01~8.10    |
| Emodin             | $y = 127.59x - 399.87$ | 0.9991 | 0.25~250.00  |
| Chrysophanol       | $y = 66.495x + 18.005$ | 0.9995 | 0.03~5.00    |
| Physcion           | $y = 80.504x + 326.26$ | 0.9995 | 0.22~44.00   |

HSW: *Polygonum multiflorum* Thunb.

**Table S3** Intra- and inter-day precision for 16 components in HSW (mean  $\pm$  s, n=6)

| Component                   | Concentration<br>( $\mu\text{g/mL}$ ) | Intra-assay        |      | Inter-assay        |      |
|-----------------------------|---------------------------------------|--------------------|------|--------------------|------|
|                             |                                       | mean $\pm$ s       | RSD% | mean $\pm$ s       | RSD% |
|                             | 4.1                                   | 4.04 $\pm$ 0.02    | 0.50 | 4.08 $\pm$ 0.01    | 0.25 |
| Gallic acid                 | 16.38                                 | 16.41 $\pm$ 0.27   | 1.64 | 16.35 $\pm$ 0.26   | 1.59 |
|                             | 32.75                                 | 32.67 $\pm$ 0.65   | 1.99 | 32.56 $\pm$ 0.58   | 1.78 |
|                             | 2.41                                  | 2.38 $\pm$ 0.01    | 0.42 | 2.36 $\pm$ 0.03    | 1.27 |
| Procyanidins B <sub>1</sub> | 13.45                                 | 13.31 $\pm$ 0.24   | 1.80 | 13.39 $\pm$ 0.25   | 1.87 |
|                             | 38.5                                  | 38.77 $\pm$ 0.35   | 0.90 | 38.34 $\pm$ 0.45   | 1.17 |
|                             | 3.31                                  | 3.28 $\pm$ 0.01    | 0.38 | 3.26 $\pm$ 0.05    | 1.53 |
| Catechin                    | 47.90                                 | 47.77 $\pm$ 0.35   | 0.73 | 47.68 $\pm$ 0.56   | 1.17 |
|                             | 92.5                                  | 92.31 $\pm$ 0.24   | 0.26 | 92.28 $\pm$ 1.25   | 1.35 |
|                             | 2.54                                  | 2.47 $\pm$ 0.02    | 0.94 | 2.46 $\pm$ 0.04    | 1.63 |
| Gallate                     | 19.02                                 | 18.93 $\pm$ 0.14   | 0.73 | 18.86 $\pm$ 0.23   | 1.22 |
|                             | 35.5                                  | 35.31 $\pm$ 0.63   | 1.78 | 35.36 $\pm$ 0.45   | 1.27 |
| Aloe-emodin<br>glycoside    | 1.22                                  | 1.25 $\pm$ 0.02    | 1.60 | 1.18 $\pm$ 0.02    | 1.69 |
|                             | 5.48                                  | 5.37 $\pm$ 0.06    | 1.12 | 5.39 $\pm$ 0.08    | 1.48 |
|                             | 9.75                                  | 9.66 $\pm$ 0.11    | 1.15 | 9.72 $\pm$ 0.10    | 1.03 |
| Polydatin                   | 1.95                                  | 1.84 $\pm$ 0.03    | 1.63 | 1.92 $\pm$ 0.03    | 1.25 |
|                             | 16.6                                  | 16.36 $\pm$ 0.27   | 1.65 | 16.42 $\pm$ 0.15   | 0.91 |
|                             | 31.25                                 | 30.98 $\pm$ 0.18   | 0.58 | 30.88 $\pm$ 0.56   | 1.81 |
| Stilbene glucoside          | 248                                   | 246.23 $\pm$ 1.35  | 0.55 | 245.89 $\pm$ 2.36  | 0.96 |
|                             | 1076                                  | 1074.59 $\pm$ 1.56 | 0.15 | 1074.22 $\pm$ 1.23 | 0.11 |
|                             | 4056                                  | 4053.21 $\pm$ 2.36 | 0.06 | 4054.28 $\pm$ 2.54 | 0.06 |
| Rhaponticin                 | 0.41                                  | 0.43 $\pm$ 0.007   | 1.63 | 0.39 $\pm$ 0.01    | 1.79 |
|                             | 8.88                                  | 8.82 $\pm$ 0.09    | 1.07 | 8.79 $\pm$ 0.11    | 1.25 |
|                             | 35.5                                  | 35.43 $\pm$ 0.21   | 0.60 | 35.35 $\pm$ 0.56   | 1.58 |

|                   |        |             |      |             |      |
|-------------------|--------|-------------|------|-------------|------|
|                   | 1.47   | 1.37±0.02   | 1.46 | 1.42±0.02   | 1.41 |
| Resveratrol       | 24.24  | 23.73±0.26  | 0.98 | 24.11±0.26  | 1.08 |
|                   | 47.00  | 46.90±0.73  | 1.55 | 46.78±0.88  | 1.88 |
|                   | 7.81   | 7.97±0.15   | 1.88 | 7.74±0.15   | 1.94 |
| Emodin glycosides | 62.50  | 61.27±0.17  | 0.27 | 60.89±1.17  | 1.92 |
|                   | 375.00 | 374.23±0.63 | 0.17 | 368.98±4.56 | 1.24 |
| Physcion          | 0.67   | 0.60±0.01   | 1.57 | 0.62±0.01   | 1.61 |
| glycosides        | 5.38   | 5.41±0.03   | 0.55 | 5.28±0.10   | 1.89 |
|                   | 43     | 41.92±0.23  | 0.55 | 42.22±0.56  | 1.33 |
|                   | 0.28   | 0.26±0.005  | 1.92 | 0.25±0.01   | 2.00 |
| Aloe emodin       | 4.58   | 4.44±0.07   | 1.68 | 4.52±0.07   | 1.65 |
|                   | 8.88   | 8.89±0.17   | 1.91 | 8.78±0.12   | 1.37 |
|                   | 0.20   | 0.18±0.003  | 1.67 | 0.18±0.002  | 1.11 |
| Rhein             | 7.41   | 7.38±0.11   | 1.49 | 7.35±0.09   | 1.22 |
|                   | 14.62  | 14.46±0.09  | 0.62 | 14.34±0.15  | 1.05 |
|                   | 15.62  | 15.11±0.26  | 1.69 | 15.28±0.12  | 0.79 |
| Emodin            | 132.81 | 131.48±2.45 | 1.86 | 130.89±2.33 | 1.78 |
|                   | 250    | 248.53±2.89 | 1.16 | 248.25±2.25 | 0.91 |
|                   | 0.22   | 0.17±0.003  | 1.76 | 0.19±0.003  | 1.58 |
| Chrysophanol      | 2.64   | 2.59±0.03   | 1.18 | 2.31±0.05   | 1.90 |
|                   | 5.06   | 5.03±0.03   | 0.59 | 4.95±0.06   | 1.21 |
|                   | 2.75   | 2.55±0.03   | 1.29 | 2.68±0.03   | 1.23 |
| Physcion          | 23.36  | 23.31±0.16  | 0.69 | 22.56±0.20  | 0.89 |
|                   | 44     | 43.44±0.34  | 0.78 | 42.78±0.78  | 1.82 |

HSW: *Polygonum multiflorum* Thunb.

**Table S4** Reproducibility and stability of 16 components in HSW(mean±s, n=6)

| Component                   | Reproducibility (µg/mL) |      | Stability(µg/mL) |      |
|-----------------------------|-------------------------|------|------------------|------|
|                             | mean±s                  | RSD% | mean±s           | RSD% |
| Gallic acid                 | 7.69±0.02               | 0.27 | 7.64±0.14        | 1.90 |
| Procyanidins B <sub>1</sub> | 15.46±0.08              | 0.55 | 15.64±0.13       | 0.84 |
| Catechin                    | 42.03±0.13              | 0.30 | 41.59±0.18       | 0.42 |
| Gallate                     | 2.06±0.03               | 1.23 | 2.05±0.04        | 1.95 |
| Aloe-emodin glycoside       | 5.27±0.10               | 1.90 | 5.15±0.04        | 0.85 |
| Polydatin                   | 14.43±0.10              | 0.68 | 14.47±0.14       | 0.97 |
| Stilbene glucoside          | 2113.30±22.12           | 1.05 | 2064.95±21.52    | 1.04 |
| Rhaponticin                 | 3.27±0.06               | 1.96 | 3.40±0.06        | 1.83 |
| Resveratrol                 | 17.54±0.01              | 0.07 | 17.05±0.26       | 1.55 |

|                    |               |      |               |      |
|--------------------|---------------|------|---------------|------|
| Emodin glycoside   | 114.71 ± 0.16 | 0.14 | 113.56 ± 0.35 | 0.31 |
| Physcion glycoside | 1.68 ± 0.02   | 1.19 | 1.62 ± 0.01   | 0.62 |
| Aloe emodin        | 4.44 ± 0.03   | 0.68 | 4.64 ± 0.05   | 1.39 |
| Rhein              | 1.98 ± 0.02   | 1.01 | 1.97 ± 0.02   | 1.01 |
| Emodin             | 94.87 ± 0.42  | 0.44 | 95.89 ± 0.46  | 0.48 |
| Chrysophanol       | 5.11 ± 0.08   | 1.57 | 4.89 ± 0.02   | 0.42 |
| Physcion           | 45.08 ± 0.71  | 1.57 | 46.79 ± 0.22  | 0.47 |

HSW: *Polygonum multiflorum* Thunb.

**Table S5** Recovery of 16 components in HSW (mean ± s, n=6)

| Component                 | Sample<br>(µg/mL) | Added<br>(µg/mL) | Measured<br>(µg/mL) | Recovery% |
|---------------------------|-------------------|------------------|---------------------|-----------|
|                           |                   | 4.1              | 7.74 ± 0.09         | 95.27     |
| Gallic acid               | 3.83 ± 0.04       | 16.38            | 19.62 ± 2.45        | 97.01     |
|                           |                   | 32.75            | 35.11 ± 1.89        | 95.98     |
| Procyanidins              |                   | 2.41             | 12.98 ± 3.78        | 103.02    |
| B <sub>1</sub>            | 7.78 ± 0.05       | 9.63             | 17.54 ± 0.15        | 101.39    |
|                           |                   | 13.45            | 20.03 ± 2.87        | 94.36     |
| Catechin                  | 20.90 ± 0.08      | 3.31             | 25.88 ± 6.89        | 106.89    |
|                           |                   | 23.13            | 42.46 ± 0.18        | 93.20     |
|                           |                   | 47.90            | 65.12 ± 5.66        | 94.65     |
| Gallate                   | 1.03 ± 0.02       | 1.27             | 2.25 ± 0.02         | 96.32     |
|                           |                   | 2.54             | 35.07 ± 1.89        | 98.23     |
|                           |                   | 19.02            | 21.10 ± 1.34        | 105.23    |
| Aloe-emodin<br>glycosides | 2.60 ± 0.05       | 1.22             | 3.67 ± 0.65         | 96.10     |
|                           |                   | 2.44             | 5.18 ± 0.06         | 105.56    |
|                           |                   | 5.48             | 7.48 ± 0.43         | 92.59     |
| Polydatin                 | 7.23 ± 0.06       | 1.95             | 8.58 ± 0.77         | 93.48     |
|                           |                   | 7.81             | 14.55 ± 0.08        | 93.78     |
|                           |                   | 16.6             | 23.06 ± 2.49        | 96.78     |
| Stilbene<br>glucoside     | 1044.56 ± 10.91   | 248              | 237.67 ± 14.88      | 93.12     |
|                           |                   | 1014.00          | 2064.68 ± 13.68     | 100.60    |
|                           |                   | 4056             | 4812.89 ± 45.634    | 94.36     |
| Rhaponticin               | 1.67 ± 0.03       | 0.41             | 2.00 ± 0.68         | 96.25     |
|                           |                   | 2.22             | 3.94 ± 0.10         | 102.39    |
|                           |                   | 8.88             | 10.42 ± 1.35        | 98.72     |
| Resveratrol               | 8.65 ± 0.07       | 1.47             | 9.64 ± 1.59         | 95.25     |
|                           |                   | 5.88             | 15.05 ± 0.09        | 108.89    |
|                           |                   | 24.24            | 31.36 ± 6.68        | 95.35     |
| Emodin                    | 57.07 ± 0.13      | 7.81             | 59.83 ± 3.41        | 92.22     |

|              |              |        |                |        |
|--------------|--------------|--------|----------------|--------|
| glycosides   |              | 62.50  | 121.56 ± 1.25  | 103.19 |
|              |              | 375.00 | 395.60 ± 14.98 | 91.56  |
| Physcion     |              | 0.67   | 1.52 ± 0.08    | 103.72 |
| glycosides   | 0.83 ± 0.03  | 5.38   | 5.73 ± 1.04    | 92.36  |
|              |              | 43     | 41.64 ± 3.44   | 95.00  |
|              |              | 0.28   | 2.49 ± 0.08    | 97.64  |
| Aloe emodin  | 2.27 ± 0.05  | 2.22   | 4.44 ± 0.04    | 97.69  |
|              |              | 4.58   | 6.45 ± 0.36    | 94.16  |
|              |              | 0.20   | 1.17 ± 0.12    | 98.22  |
| Rhein        | 0.99 ± 0.04  | 0.92   | 1.97 ± 0.07    | 106.61 |
|              |              | 7.41   | 7.83 ± 0.72    | 93.25  |
|              |              | 15.62  | 59.92 ± 5.79   | 94.65  |
| Emodin       | 47.69 ± 0.22 | 41.88  | 91.89 ± 1.17   | 105.54 |
|              |              | 132.81 | 168.37 ± 10.52 | 93.28  |
|              |              | 0.22   | 2.51 ± 0.67    | 92.44  |
| Chrysophanol | 2.50 ± 0.03  | 2.53   | 4.89 ± 0.01    | 94.49  |
|              |              | 5.06   | 8.05 ± 1.19    | 106.51 |
|              |              | 2.75   | 28.18 ± 0.53   | 109.58 |
| Physcion     | 22.97 ± 0.23 | 22.00  | 46.79 ± 0.89   | 108.28 |
|              |              | 44     | 62.72 ± 1.73   | 93.66  |

HSW: *Polygonum multiflorum* Thunb.

**Table S6** Fingerprint similarity for 21 batches PHSW

| No | Collection location  | Similarity degree | No | Collection location  | Similarity degree |
|----|----------------------|-------------------|----|----------------------|-------------------|
| 1  | Yulin, Guangxi       | 0.999             | 12 | Dabashan, Sichuan    | 0.996             |
| 2  | Baoding, Heibei      | 0.972             | 13 | Heyuan, Guangdong    | 0.998             |
| 3  | Guangzhou, Guangdong | 0.758             | 14 | Tongrentang, Beijing | 1                 |
| 4  | Zhaoqing, Guangzhou  | 0.996             | 15 | Nantong, Jiangsu     | 0.256             |
| 5  | Bozhou, Anhui        | 0.652             | 16 | Weinan, Shanxi       | 0.998             |
| 6  | Shaoyang, Hunan      | 0.998             | 17 | Dazhou, Sichuan      | 0.996             |
| 7  | Shijiazhuang, Heibei | 0.984             | 18 | Guiyang, Guizhou     | 0.517             |
| 8  | Changsha, Hunan      | 0.993             | 19 | Hanzhou, Zhejiang    | 0.996             |
| 9  | Xi'an, Shanxi        | 0.998             | 20 | Leshan, Sichuan      | 0.889             |
| 10 | Suzhou, Jiangsu      | 0.996             | 21 | Fuzhou, Fujian       | 0.998             |
| 11 | Handan, Hebei        | 0.99              |    |                      |                   |

PHSW: Processed *Polygonum multiflorum* Thunb.

**Table S7** Principal component analysis of 21 batches PHSW

| Principal component | Eigenvalue | Variance contribution rate / % | Cumulative contribution rate / % |
|---------------------|------------|--------------------------------|----------------------------------|
| F1                  | 5.16       | 32.25                          | 32.25                            |
| F2                  | 3.28       | 20.47                          | 52.73                            |
| F3                  | 1.76       | 11.00                          | 63.73                            |
| F4                  | 1.61       | 10.06                          | 73.79                            |
| F5                  | 1.19       | 7.46                           | 81.25                            |

PHSW: Processed *Polygonum multiflorum* Thunb.**Table S8** Component loading matrix of 21 batches PHSW

| Component                   | F <sub>1</sub> | F <sub>2</sub> | F <sub>3</sub> | F <sub>4</sub> | F <sub>5</sub> |
|-----------------------------|----------------|----------------|----------------|----------------|----------------|
| Gallic acid                 | 0.73           | -0.36          | 0.13           | 0.03           | -0.36          |
| Procyanidins B <sub>1</sub> | 0.15           | -0.09          | -0.86          | 0.16           | -0.18          |
| Catechin                    | 0.56           | 0.15           | -0.68          | 0.29           | 0.17           |
| Gallate                     | -0.22          | 0.39           | 0.01           | -0.74          | 0.01           |
| Aloe-emodin glycosides      | 0.41           | 0.50           | 0.25           | 0.23           | -0.53          |
| Polydatin                   | 0.53           | 0.55           | -0.01          | 0.44           | 0.24           |
| Stilbene glucoside          | 0.87           | 0.17           | -0.09          | -0.11          | 0.29           |
| Rhaponticin                 | 0.70           | -0.37          | -0.16          | -0.16          | 0.28           |
| Resveratrol                 | 0.74           | -0.33          | 0.25           | 0.29           | -0.31          |
| Emodin glycosides           | 0.58           | 0.63           | 0.14           | -0.31          | 0.11           |
| Physcion glycosides         | 0.44           | 0.79           | -0.03          | -0.14          | 0.00           |
| Aloe emodin                 | 0.20           | 0.80           | 0.18           | 0.16           | -0.14          |
| Rhein                       | -0.35          | 0.25           | 0.29           | 0.38           | 0.54           |
| Emodin                      | 0.76           | -0.40          | 0.22           | -0.35          | 0.15           |
| Chrysophanol                | 0.23           | -0.42          | 0.45           | 0.37           | 0.26           |
| Physcion                    | 0.83           | -0.30          | 0.06           | -0.23          | 0.05           |

PHSW: Processed *Polygonum multiflorum* Thunb.**Table S9** Integrated F value of 21 batches PHSW

| No | F <sub>1</sub> | F <sub>2</sub> | F <sub>3</sub> | F <sub>4</sub> | F <sub>5</sub> | integrated F value |
|----|----------------|----------------|----------------|----------------|----------------|--------------------|
| 1  | 96.50          | 23.58          | -20.64         | -19.94         | 63.73          | 36.52              |
| 2  | 479.95         | 83.81          | -66.01         | -125.46        | 303.13         | 175.15             |
| 3  | 30.38          | 3.62           | -5.51          | -5.89          | 15.62          | 10.54              |
| 4  | 217.81         | 61.22          | -44.12         | -58.29         | 145.87         | 83.16              |
| 5  | 159.27         | 38.76          | -35.88         | -35.30         | 104.97         | 59.79              |
| 6  | 305.06         | 69.29          | -51.21         | -72.75         | 198.76         | 114.75             |

|    |        |        |         |         |        |        |
|----|--------|--------|---------|---------|--------|--------|
| 7  | 289.44 | 64.04  | -55.21  | -63.32  | 185.03 | 108.10 |
| 8  | 399.06 | 51.27  | -44.21  | -106.65 | 232.14 | 141.32 |
| 9  | 330.92 | 71.56  | -75.57  | -72.26  | 211.63 | 121.91 |
| 10 | 189.15 | 38.09  | -31.88  | -47.80  | 118.00 | 69.48  |
| 11 | 62.18  | 14.27  | -12.33  | -14.46  | 36.11  | 22.92  |
| 12 | 521.47 | 100.34 | -104.88 | -120.16 | 341.99 | 191.12 |
| 13 | 310.22 | 73.21  | -70.35  | -61.80  | 201.56 | 116.42 |
| 14 | 340.28 | 73.48  | -61.56  | -76.03  | 220.69 | 127.17 |
| 15 | 22.94  | 0.87   | -13.48  | -0.73   | 6.19   | 6.50   |
| 16 | 264.72 | 61.32  | -54.87  | -59.66  | 167.81 | 98.67  |
| 17 | 313.52 | 80.03  | -58.74  | -73.02  | 200.77 | 118.98 |
| 18 | 59.62  | -2.80  | -22.51  | -0.74   | 4.92   | 16.53  |
| 19 | 276.97 | 57.36  | -46.23  | -65.09  | 175.97 | 102.84 |
| 20 | 244.61 | 49.82  | -42.63  | -51.18  | 148.64 | 90.58  |
| 21 | 315.88 | 71.47  | -67.76  | -65.49  | 207.75 | 118.27 |

PHSW: Processed *Polygonum multiflorum* Thunb.

**Table S10** Weight factor of component to the whole PHSW

| Component             | A1    | A2    | A3    | A4    | A5    | Wt    | W      | % of weight |
|-----------------------|-------|-------|-------|-------|-------|-------|--------|-------------|
| Gallic acid           | 0.32  | -0.20 | 0.10  | 0.02  | -0.33 | 5.15  | 131.49 | 3.92        |
| Procyanidins B1       | 0.07  | -0.05 | -0.65 | 0.13  | -0.16 | -5.98 |        | -4.55       |
| Catechin              | 0.25  | 0.08  | -0.51 | 0.23  | 0.16  | 7.47  |        | 5.68        |
| Gallate               | -0.10 | 0.22  | 0.01  | -0.58 | 0.01  | -4.43 |        | -3.37       |
| Aloe-emodin glycoside | 0.18  | 0.28  | 0.19  | 0.18  | -0.49 | 11.75 |        | 8.94        |
| Polydatin             | 0.23  | 0.30  | -0.01 | 0.35  | 0.22  | 18.79 |        | 14.29       |
| Stilbene glucoside    | 0.38  | 0.09  | -0.07 | -0.09 | 0.27  | 14.64 |        | 11.13       |
| Rhaponticin           | 0.31  | -0.20 | -0.12 | -0.13 | 0.26  | 5.07  |        | 3.86        |
| Resveratrol           | 0.33  | -0.18 | 0.19  | 0.23  | -0.28 | 9.03  |        | 6.87        |
| Emodin glycoside      | 0.26  | 0.35  | 0.11  | -0.24 | 0.10  | 14.81 |        | 11.27       |
| Physcion glycoside    | 0.19  | 0.44  | -0.02 | -0.11 | 0.00  | 13.82 |        | 10.51       |
| Aloe emodin           | 0.09  | 0.44  | 0.14  | 0.13  | -0.13 | 13.69 |        | 10.41       |
| Rhein                 | -0.15 | 0.14  | 0.22  | 0.30  | 0.49  | 6.96  |        | 5.29        |
| Emodin                | 0.33  | -0.22 | 0.17  | -0.28 | 0.14  | 6.34  |        | 4.82        |
| Chrysophanol          | 0.10  | -0.23 | 0.34  | 0.29  | 0.24  | 6.96  |        | 5.29        |
| Physcion              | 0.37  | -0.17 | 0.05  | -0.18 | 0.05  | 7.41  |        | 5.63        |

PHSW: Processed *Polygonum multiflorum* Thunb.

Fig.S1 HCA analysis of PHSW decoction pieces with 16 components

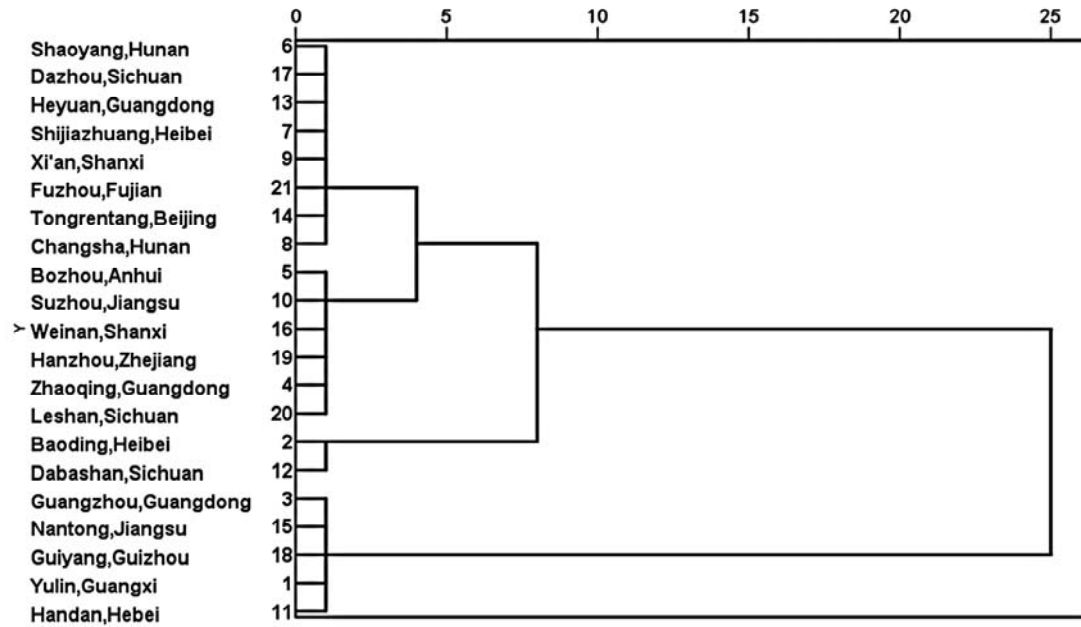

Fig.S2 HCA analysis of PHSW decoction pieces with selected 6 representative components

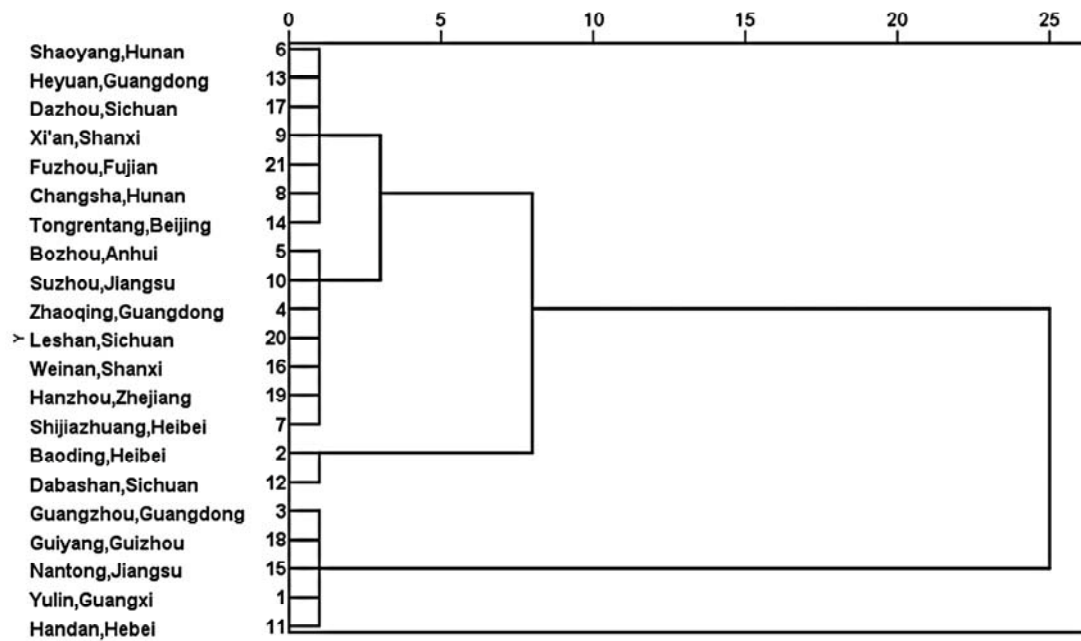

Supplement: f1 [file 6238464.f1.pdf]
